# Supplementary material for: Biocompatible polymers with tunable mechanical properties and conductive functionality on two-photon 3D printing
Source: Royal Society of Chemistry journal article supplement (doi:10.1039/d2ra07464h), 2023-01-01
Supplement: d2ra07464h1.pdf [file d2ra07464h1.pdf]

## **Biocompatible polymers with tunable mechanical properties and functionalities for two-photon 3D printing ( Supplementary material )**

Lijun Men,<sup>a</sup> Kemin Wang,<sup>a</sup> Ningning Hu,<sup>a</sup> Fule Wang,<sup>b</sup> Yucheng Deng,<sup>a</sup> Chris Zhang<sup>\*a,c</sup> and Ruixue Yin<sup>\*b</sup>

### **Mechanical long-term stability experiment**

In this study, we performed the manual pressing experiment on the microneedle structure two months after two-photon printing. As shown in the video below, we repeatedly press the hollow microneedle structure in the video, and the microneedle can always quickly return to the prototype. Experiments demonstrate that our structure has long-term stability.

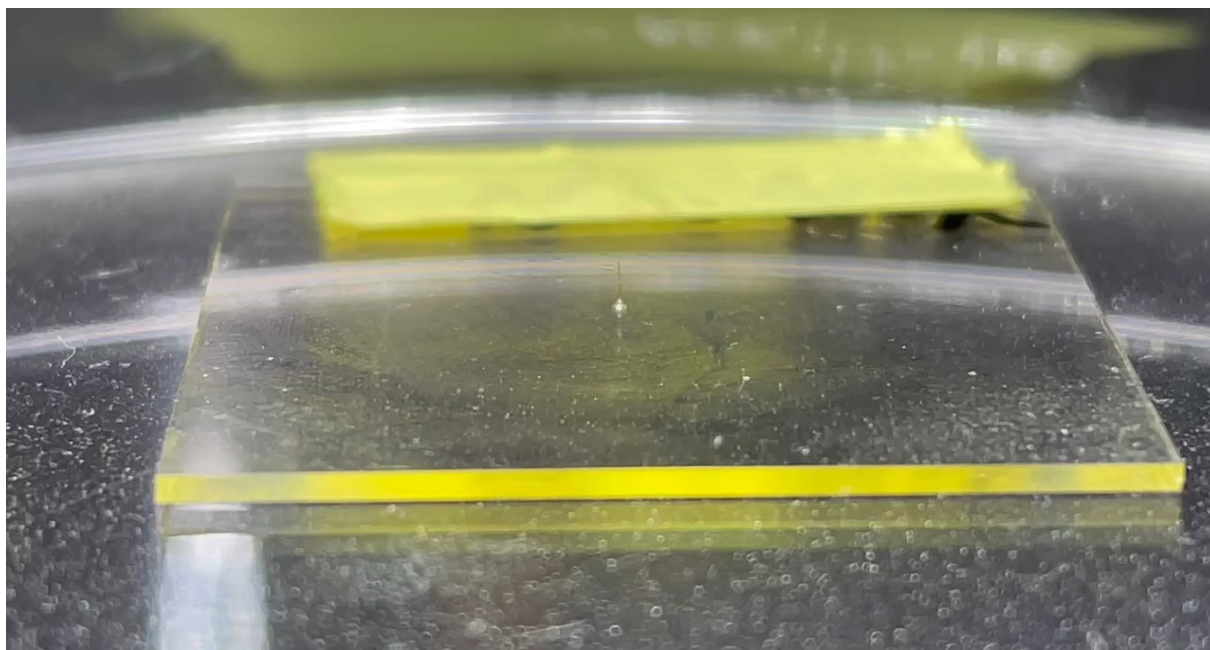

Supplementary Video S1. Mechanics experiment of microneedles.
